# Supplementary material for: Nationwide Molecular Epidemiology of Measles Virus in Japan Between 2008 and 2017
Source: Front Microbiol. 2019 Jul 4;10:1470. doi: 10.3389/fmicb.2019.01470 (PMC6620789; doi:10.3389/fmicb.2019.01470)
Supplement: Supplementary file 1 [file Table_1.XLSX]

## Sheet: Sup Table1
Supplemental table 1. Information of WHO reference, WHO-named, JPN representative, and detected-foreign countries MV strains used in this study.
Genotype	N-450	Strain	Accession no.	Classification
A		MVi/Maryland.USA/0.54	U01987	WHO Reference strain
B1		MVi/Yaounde.CMR/12.83	U01998	WHO Reference strain
B2		MVi/Libreville.GAB/0.84	U01994	WHO Reference strain
B3		MVi/New York.USA/0.94	L46753	WHO Reference strain
		MVi/Ibadan.NGA/0.97/1	AJ232203	WHO Reference strain
	seq1	Mvs/FukuokaC.JPN/20.13/1[B3]	AB824722	JPN
	seq2	Mvs/Aichi.JPN/52.13	AB914699	JPN
		MVs/London.GBR/3.14/2/[B3]	KT732220	Foreign countries
		MVs/WesternAustralia.AUS/5.14/[B3]	KJ535474	Foreign countries
	seq3	Mvs/KyotoC.JPN/50.13[B3]	LC462844	JPN
	seq4	Mvs/Aichi.JPN/25.14/7	AB980804	JPN
	seq5	Mvs/Shizuoka.JPN/10.14[B3]	MK547181	JPN
	seq6	Mvs/Sagamihara C.JPN/15.14/M4001[B3]	AB971347	JPN
		MVs/HongKong.CHN/17.14/2[B3]	KJ832081	Foreign countries
	seq7	Mvs/Kanagawa.JPN/4.14[B3]	LC462835	JPN
	seq8	Mvs/GifuC.JPN/8.14[B3]	LC462848	JPN
	seq9	MVs/Tokyo.JPN/4.14/2[B3]	LC463036	JPN
		MVi/Srwk.MYS/35.10/[B3]	JQ417717	Foreign countries
		MVs/Bradford.GBR/18.12/[B3]	JX126855	Foreign countries
	seq10	Mvs/Kawasaki_C.JPN/7.14[B3]	AB983354	JPN
	seq11	MVs/Osaka.JPN/8.14/2[B3]	AB983241	JPN
	seq12	MVs/Osaka.JPN/14.14[B3]	AB983598	JPN
	seq13	MVs/Osaka.JPN/19.14[B3]	AB983605	JPN
		MVs/HongKong.CHN/10.14/3[B3]	KJ605474	Foreign countries
	seq14	Mvs/Gifu.JPN/36.14[B3]	MK547183	JPN
	seq15	MVs/AmagasakiC.JPN/14.15[B3]	LC462839	JPN
		MVs/Anantpur.IND/26.15/26[B3]	KT624199	Foreign countries
	seq16	MVi/Mie.JPN/11.16[B3]	LC183908	JPN
	seq17	MVs/Tokyo.JPN/45.13[B3]	LC463035	JPN
	seq18	MVs/Tokyo.JPN/6.14/2[B3]	LC463037	JPN
	seq19	MVs/Kawasaki City.JPN/10.17[B3]	MK547180	JPN
		MVs/Kansas.USA/1.12/1[B3]	JX315576	WHO named strain
	seq20	MVs/Dublin.IRL/8.16/[B3]	KY013331	WHO named strain
		Mvs/Yokohama.JPN/26.17[B3]	LC315150	JPN
	seq21	Mvs/Fukuoka.JPN/08.17/FG29[B3]	LC218722	JPN
	seq22	Mvs/Gunma.JPN/14.17[B3]	LC462841	JPN
	seq23	MVs/Allada.BEN/3.10/1[B3]	JF973026	WHO named strain
		Mvs/FukuokaC.JPN/9.17[B3]	LC464977	JPN
		MVi/Harare.ZWE/38.09/1[B3]	JF973033	WHO named strain
		MVs/Liverpool.GBR/5.12/[B3]	JX162015	WHO named strain
		MVs/Saint Denis.FRA/36.17[B3]	AVV81842	WHO named strain
		MVs/Nottingham.GBR/50.05	EU416323	WHO named strain
		MVs/Niger.NGA/8.13/[B3]	KX943236.1	WHO named strain
		MVs/Kabul.AFG/20.2014/3[B3]	KP714335	WHO named strain
		MVs/Como.ITA/32.15/[B3]	KX785098.1	WHO named strain
		MVs/Tonbridge.GBR/5.14/[B3]	KJ650198	WHO named strain
		MVs/Western Australia.AUS/2.14/[B3]	KJ364637	WHO named strain
C1		MVi/Tokyo.JPN/0.84	AY043459	WHO Reference strain
C2		MVi/Maryland.USA/0.77	M89921	WHO Reference strain
		MVi/Erlangen.DEU/0.90	X84872	WHO Reference strain
D1		MVi/Bristol.JPN/0.74	D01005	WHO Reference strain
D2		MVi/Johnnesburg.ZAF/0.88/1	U64582	WHO Reference strain
D3		MVi/Illinois.USA/0.89/1	U01977	WHO Reference strain
D4		MVi/Montreal.CAN/0.89	U01976	WHO Reference strain
	seq1	MVs/Enfield.GBR/14.07/[D4]	EF600554	WHO named strain
		MVs/Osaka.JPN/21.08/1[D4]	AB551738	JPN
	seq2	Mvs/Sapporo.JPN/48.10/1[D4]	AB605257	JPN
	seq3	MVs/Manchester.GBR/10.09/[D4]	GQ370461	WHO named strain
		MVs/Tokyo.JPN/03.11/1[D4]	AB666381	JPN
	seq4	Mvs/HiroshimaC.JPN/19.11[D4]	AB636408	JPN
		Mvs/Damavand.IRN/27.12/4[D4]	JX631254	Foreign countries
	seq5	MVs/Toyama.JPN/11.2012[D4]	AB705160	JPN
	seq6	MVs/Marmande.FRA/43.11/2[D4]	KF715442	WHO named strain
		MVs/Tokyo.JPN/30.12[D4]	LC463033	JPN
		MVi/Bandarabas.IRN/05.10/2	HM440227	WHO named strain
		MVs/Hamburg.DEU/03.09[D4]	HQ436108	WHO named strain
		MVs/Belfast.GBR/2.10/[D4]	KT588027	WHO named strain
		MVs/Madrid.ESP/46.10/[D4]	KX499400	WHO named strain
		MVs/Sistan.IRN/42.10/[D4]	HQ668021	WHO named strain
		MVs/Chester.GBR/38.08/[D4]	FJ437671	WHO named strain
		MVs/Birmingham.GBR/7.09/[D4]	KT588028	WHO named strain
		MVs/Maramures.ROU/03.11/[D4]	JX841109	WHO named strain
D5		MVi/Palau/0.93	L46758	WHO Reference strain
		MVi/Bangkok.THA/12.93	AF079555	WHO Reference strain
	seq1	MVs/Okinawa.JPN/37.06	AB447495	WHO named strain
		MVs/Akita.JPN/01.08/1	EU402924	JPN
	seq2	MVs/Kanagawa.JPN/15.08[D5]	AB573809	JPN
	seq3	Mvi/Okinawa.JPN/35.08[D5]	LC462843	JPN
	seq4	MVs/Kanagawa.JPN/28.08[D5]	AB573811	JPN
	seq5	Mvs/Hokkaido.JPN/22.08/18491[D5]	AB593776	JPN
	seq6	Mvs/Chiba C.JPN/3.08[D5]	AB593810	JPN
	seq7	Mvs/Chiba C.JPN/41.08[D5]	AB593811	JPN
D6		MVi/New Jersey.USA/0.94/1	L46750	WHO Reference strain
D7		MVi/Victoria.AUS/16.85	AF243450	WHO Reference strain
		MVi/Illinois.USA/50.99	AY037020	WHO Reference strain
D8		MVi/Manchester.GBR/30.94	AF280803	WHO Reference strain
	seq1	Mvs/Yokohama.JPN/36.10[D8]	AB597556	JPN
	seq2	Mvs/Hiroshima.JPN/9.11/1[D8]	AB621949	JPN
		MVs/Ontario.CAN/13.11/1[D8]	JF911794	Foreign countries
	seq3	MVs/Tokyo.JPN/17.11/5[D8]	AB666449	JPN
	seq4	Mvs/Hokkaido.JPN/23.11/[D8]	AB702687	JPN
	seq5	MVs/Tottori.JPN/41.11/[D8]	AB781331	JPN
	seq6	MVi/Villupuram.IND/03.07	FJ765078	WHO named strain
		Mvs/Chiba.JPN/52.11	AB699693	JPN
	seq7	MVs/Frankfurt Main.DEU/17.11[D8]	KF683445	WHO named strain
		Mvs/ShizuokaC.JPN/33.13/13R070[D8]	AB860326	JPN
	seq8	MVi/Hulu Langat.MYS/26.11/[D8]	JX486001	WHO named strain
		MVs/Osaka.JPN/16.14/1[D8]	AB983600	JPN
	seq9	MVs/SapporoC.JPN/26.14/4[D8]	LC040956	JPN
		MVs/Roma.ITA/45.14/2[D8]	KR025169	Foreign countries
		MVs/WesternAustralia.AUS/23.14/[D8]	KM066605	Foreign countries
	seq10	MVs/Kanagawa.JPN/26.14[D8]	LC462836	JPN
	seq11	Mvs/Kawasaki_C.JPN/13.14[D8]	AB983347	JPN
		MVs/WesternAustralia.AUS/11.14/[D8]	KJ690778	Foreign countries
	seq12	MVi/Okinawa.JPN/37.09[D8]	AB523885	JPN
		MVs/Pennsylvania.USA/13.09/1	FJ904785	Foreign countries
	seq13	Mvs/Kobe.JPN/34.14/14016	LC005618	JPN
	seq14	Mvs/Yokohama.JPN/45.14[D8]	LC010282	JPN
	seq15	MVs/Kanagawa.JPN/46.14[D8]	LC462837	JPN
	seq16	Mvs/Yokohama.JPN/9.15[D8]	LC033784	JPN
	seq17	MVs/Osaka.JPN/29.15[D8]	LC072667	WHO named strain
		MVs/Osaka.JPN/29.15[D8]	LC072667	JPN
	seq18	Mvs/SapporoC.JPN/40.15[D8]	LC090760	JPN
		MVs/KotaBahru.MYS/22.16/2/[D8]	KY679882	Foreign countries
		MVs/KotaBahru.MYS/22.16/[D8]	KY679881	Foreign countries
		MVi/TelukIntan.MYS/14.16/[D8]	KX785108	Foreign countries
		MVs/TelukIntan.MYS/18.16/[D8]	KX761853	Foreign countries
		MVs/TelukIntan.MYS/18.16/5[D8]	KX761852	Foreign countries
		MVs/TelukIntan.MYS/17.16/4[D8]	KX761851	Foreign countries
		MVs/TelukIntan.MYS/17.16/3[D8]	KX761850	Foreign countries
		MVs/TelukIntan.MYS/17.16/2[D8]	KX761849	Foreign countries
		MVs/TelukIntan.MYS/17.16/[D8]	KX761848	Foreign countries
		MVi/PasirMas.MYS/13.16/[D8]	KX761846	Foreign countries
		MVi/AlorSetar.MYS/11.16/[D8]	KX609003	Foreign countries
		MVs/KualaLumpur.MYS/11.15/[D8]	KU746874	Foreign countries
		MVs/Victoria.AUS/13.15/2[D8]	KR119083	Foreign countries
	seq19	MVs/HamamatsuC.JPN/44.15[D8]	LC153710	JPN
	seq20	MVs/Tokushima.JPN/48.15[D8]	LC462846	JPN
	seq21	MVs/Tokyo.JPN/48.15[D8]	LC463042	JPN
	seq22	MVs/Gunma.JPN/7.16[D8]	LC462840	JPN
		MVs/Jerusalem.ISR/9.16/9[D8]	KU986914	Foreign countries
	seq23	MVs/KyotoC.JPN/27.14[D8]	LC462845	JPN
	seq24	MVs/Tokyo.JPN/8.14[D8]	LC463038	JPN
		MVs/HoChiMinh.VNM/9.14/MV1[D8]	AB928085	Foreign countries
	seq25	MVs/Tokyo.JPN/12.14/3[D8]	LC463039	JPN
	seq26	MVs/Tokyo.JPN/22.14/2[D8]	LC463040	JPN
	seq27	MVs/Tokyo.JPN/25.14[D8]	LC463041	JPN
	seq28	MVs/Aichi.JPN/38.16[D8]	LC190728	JPN
		MVs/Western Australia.AUS/3.17/2[D8]	KY828595	Foreign countries
		MVs/Western Australia.AUS/4.17/[D8]	KY801702	Foreign countries
		MVs/Western Australia.AUS/3.17/[D8]	KY801701	Foreign countries
		MVs/Western Australia.AUS/2.17/[D8]	KY801700	Foreign countries
		MVs/SouthAustralia.AUS/20.16/[D8]	KX377941	Foreign countries
	seq29	MVs/Tokyo.JPN/35.16/4[D8]	LC463043	JPN
	seq30	MVs/Chiba.JPN/32.16/2[D8]	LC212961	JPN
	seq31	MVs/Tokyo.JPN/40.16/[D8]	LC463044	JPN
	seq32	MVs/Chiba.JPN/42.16[D8]	LC212964	JPN
	seq33	MVs/Hiroshima.JPN/41.16[D8]	MK547185	JPN
		MVs/NewSouthWales.AUS/10.16/[D8]	KX013498	Foreign countries
	seq34	MVs/SagamiharaC.JPN/32.16/M6005[D8]	LC198225	JPN
		MVs/FrankfurtamMain.DEU/23.16/[D8]	KX865117	Foreign countries
		MVs/BadEms.DEU/11.16/[D8]	KX377944	Foreign countries
	seq35	MVs/Aichi.JPN/40.16[D8]	LC190729	JPN
	seq36	Mvs/Oita.JPN/3.17[D8]	LC462849	JPN
	seq37	Mvs/Mie.JPN/5.17[D8]	LC462834	JPN
	seq38	Mvs/Hiroshima.JPN/5.17[D8]	MK547186	JPN
	seq39	MVs/NagoyaC.JPN/5.17[D8]	MK605408	JPN
	seq40	Mvs/Fukuoka.JPN/08.17/FG36[D8]	LC218724	JPN
	seq41	Mvs/SaitamaC.JPN/9.17[D8]	LC460995	JPN
		MVs/Budapest.HUN/32.17/D8	MG323534	Foreign countries
		MVs/Netanya.ISR/35.17/[D8]	MG030676	Foreign countries
		MVs/Khurda.IND/12.17/12/2[D8]	MF125086	Foreign countries
		MVs/Khurda.IND/12.17/12/[D8]	MF125085	Foreign countries
		MVs/Jagatsinghpur.IND/2.17/2/2[D8]	MF112232	Foreign countries
		MVs/Jagatsinghpur.IND/2.17/2/[D8]	MF112231	Foreign countries
		MVs/Nebraska.USA/11.17/[D8]	MF045440	Foreign countries
		MVs/Puri.IND/53.16/53/[D8]	KY646188	Foreign countries
		MVs/Jagatsinghpur.IND/50.16/49/[D8]	KY646183	Foreign countries
		MVs/Cuttack.IND/50.16/49/2[D8]	KY646182	Foreign countries
		MVs/Cuttack.IND/50.16/49/[D8]	KY646181	Foreign countries
		MVs/Vellore.IND/50.16/49/2[D8]	KY646180	Foreign countries
		MVs/Orissa.IND/19.15/19[D8]	KT752485	Foreign countries
	seq42	Mvs/Nagano.JPN/11.17[D8]	LC462847	JPN
	seq43	Mvs/Kagawa.JPN/12.17[D8]	LC465147	JPN
	seq44	Mvs/Ishikawa.JPN/14.17[D8]	LC462833	JPN
	seq45	Mvs/Tokyo.JPN/30.17[D8]	LC463045	JPN
		MVs/Stockholm.SWE/13.17/[D8]	KY928279	Foreign countries
		MVs/Northern Territory.AUS/12.17/[D8]	KY880977	Foreign countries
		MVs/SouthAustralia.AUS/35.17/[D8]	MF977803	Foreign countries
	seq46	Mvs/Chiba.JPN/32.17[D8]	LC465148	JPN
	seq47	Mvs/SaitamaC.JPN/39.17[D8]	LC460996	JPN
		MVs/Victoria.AUS/39.17/3[D8]	MG210562	Foreign countries
		MVs/Victoria.AUS/43.17/[D8]	MG460612	Foreign countries
	seq48	MVs/Miyagi.JPN/38.17[D8]	LC330858	JPN
	seq49	MVs/Toyama.JPN/40.17[D8]	LC329348	JPN
	seq50	Mvs/NaganoC.JPN/12.17[D8]	LC462832	JPN
	seq51	Mvs/Kumamoto.JPN/17.17[D8]	LC462842	JPN
		MVs/Taunton.GBR/27.12/[D8]	JX984461	WHO named strain
		MVs/Rostov_on_Don.RUS/47.13/2[D8]	KT588029	WHO named strain
		MVs/Herborn.DEU/05.17/[D8]	KY973620	WHO named strain
		MVs/Cambridge.GBR/5.16/[D8]	KX161662	WHO named strain
		MVs/Republic_of_Komi.RUS/35.13/[D8]	KT588030	WHO named strain
		MVs/Victoria.AUS/6.11/[D8]	KF469368	WHO named strain
		MVs/Chui.KGZ/53.14/[D8]	KU728741	WHO named strain
		MVs/Gir Somnath.IND/42.16/[D8]	KY120864	WHO named strain
		MVs/Gadag.IND/02.13[D8]	KC862252	WHO named strain
		MVs/Swansea.GBR/4.13/[D8]	KF214761	WHO named strain
D9		MVi/Victoria.AUS/12.99	AF481485	WHO Reference strain
	seq1	MVi/Yamagata.JPN/12.09	AB509376	JPN
		Mvs/Moscow.RUS/41.08	GQ260640	Foreign countries
	seq2	MVs/Aichi.JPN/26.10	AB576644	JPN
		MVs/Manila/PHL/39.10/6603[D9]	KM066706	Foreign countries
		MVs/Nebraska.USA/20.10/[D9]	HQ214121	Foreign countries
	seq3	MVs/Aichi.JPN/46.10	AB602911	JPN
	seq4	MVs/Aichi.JPN/47.10	AB602912	JPN
		MVs/Benguet/PHL/6.11/1408[D9]	KM066709	Foreign countries
	seq5	MVs/HiroshimaC.JPN/02.11/1[D9]	AB611685	JPN
		MVs/HongKong.CHN/39.11 [D9]	JN827385	Foreign countries
	seq6	MVs/Tokyo.JPN/03.11/2[D9]	AB666428	JPN
		MVs/Iloilo/PHL/11.11/3747[D9]	KM066716	Foreign countries
	seq7	Mvs/Yokohama.JPN/4.11[D9]	AB612147	JPN
	seq8	MVs/Osaka.JPN/14.11[D9]	AB645762	JPN
	seq9	MVs/Hiroshima.JPN/14.11[D9]	AB640866	JPN
	seq10	MVs/Tokyo.JPN/21.11/3[D9]	AB666448	JPN
	seq11	MVs/Himeji C.JPN/27.11[D9]	AB647329	JPN
		MVs/California.USA/19.11/[D9]	JX215250	Foreign countries
	seq12	MVs/Bristol.GBR/13.05	EF079125	WHO named strain
		MVs/Aichi.JPN/32.11	AB665787	JPN
	seq13	MVs/Niigata.JPN/38.11[D9]	AB675481	JPN
		MVs/Istanbul.TUR/10.11/1[D9]	JQ417665	Foreign countries
	seq14	Mvs/Hyogo.JPN/34.12[D9]	AB773280	JPN
	seq15	MVs/Yamanashi.JPN/51.12	AB779760	WHO named strain
		Mvs/Yamanashi.JPN/51.12	AB779760	JPN
	seq16	MVs/KitakyushuC.JPN/50.13[D9]	LC003042	JPN
		MVs/HongKong.CHN/37.13/1[D9]	KF779497	Foreign countries
	seq17	Mvs/FukuokaC.JPN/10.14/4008[D9]	AB921562	JPN
	seq18	MVs/AmagasakiC.JPN/3.14[D9]	LC462838	JPN
	seq19	Mvs/Kagoshima.JPN/16.14[D9]		JPN
		MVs/NewSouthWales.AUS/40.13/[D9]	KF715482	Foreign countries
		MVi/Hulu-Langat.MYS/21.12/[D9]	JX275768	Foreign countries
D10		MVi/Kampala.UGA/51.00/1	AY923185	WHO Reference strain
D11		MVi/Menglian.Yunnan.CHN/47.09	GU440571	WHO Reference strain
E		MVi/Goettingen.DEU/0.71	X84879	WHO Reference strain
F		MVi/Madrid.ESP/0.94(SSPE)	X84865	WHO Reference strain
G1		MVi/Berkeley.USA/0.83	U01974	WHO Reference strain
G2		MVi/Amsterdam.NLD/49.97	AF171232	WHO Reference strain
G3		MVi/Gresik.INO/18.02	AY184217	WHO Reference strain
	seq1	MVs/ChibaC.JPN/08.11[G3]	AB618553	JPN
	seq2	MVs/Kagoshima.JPN/40.11[G3]	AB682758	JPN
H1		MVi/Hunan.CHN/0.93/7	AF045212	WHO Reference strain
	seq1	MVs/Osaka.JPN/10.08/4[H1]	AB457180	JPN
		MVs/Chayi.TWN/11.08	GQ338671	Foreign countries
		MViSh706	EU280897	Foreign countries
	seq2	MVs/Keelung.CHN/18.92/3	EU914228	WHO named strain
		Mvs/Sapporo.JPN/19.10/1[H1]	AB569977	JPN
	seq3	MVs/Ibaraki.JPN/20.10/1[H1]	AB573183	JPN
		MVi/Zhejiang.CHN/12.09/1[H1]	KJ755980	Foreign countries
		MVi/Zhejiang.CHN/10.05/1[H1]	KJ755976	Foreign countries
		MViSh705	EU280896	Foreign countries
		MVs/Taiwan/22.92/2	AY737400	Foreign countries
	seq4	MVs/Hong Kong.CHN/49.12[H1]	KC417295	WHO named strain
		Mvs/Fukushima.JPN/20.12[H1]	MK547182	JPN
	seq5	MVs/Tokyo.JPN/39.12[H1]	LC463034	JPN
	seq6	MVs/Aichi.JPN/9.13	AB807885	JPN
		MVs/Catania.ITA/12.16 [H1]	KY801715	Foreign countries
		MVs/Catania.ITA/11.16 [H1]	KY801714	Foreign countries
	seq7	MVs/Aichi.JPN/10.13	AB807886	JPN
		MVs/HongKong.CHN/12.13[H1]	KC917286	Foreign countries
	seq8	MVs/Hong Kong.CHN/42.11[H1]	JQ031212	WHO named strain
		MVs/Osaka.JPN/10.13[H1]	AB824116	JPN
		MVs/Guizhou.CHN/29.13[H1]	KT588921	Foreign countries
	seq9	MVs/Osaka.JPN/25.13[H1]	AB915259	JPN
	seq10	Mvs/Aichi.JPN/20.14/1	AB968373	JPN
		MVs/California.USA/21.14/[H1]	KX833222	Foreign countries
	seq11	MVs/Saitama.JPN/15.14[H1]	MK576146	JPN
	seq12	MVs/Hong Kong.CHN/06.13[H1]	KC759164	WHO named strain
		MVs/Osaka.JPN/9.14[H1]	AB983596	JPN
	seq13	MVs/Nara.JPN/28.15[H1]	LC090856	JPN
	seq14	MVi/Ibaraki.JPN/19.16[H1]	LC209105	JPN
		MVs/Ulaanbaatar.MNG/3.16/[H1]	KX389878	Foreign countries
		MVs/Seoul.KOR/7.16[H1]	KX523258	Foreign countries
		MVs/Berlin.DEU/03.16/[H1]	KU679371	Foreign countries
	seq15	MVs/KumamtoC. JPN/40.16[H1]	LC196168	JPN
		MVs/HongKong.CHN/14.18/[H1]	MH193409	Foreign countries
	seq16	MVs/Chiba.JPN/34.16[H1]	LC213013	JPN
		MVs/Cambridge.GBR/36.13/[H1]	KT588026	WHO named strain
H2		MVi/Beijing.CHN/0.94/1	AF045217	WHO Reference strain
